# Supplementary material for: Carvacrol preserves antioxidant status and attenuates kidney fibrosis via modulation of TGF-β1/Smad signaling and inflammation
Source: Royal Society of Chemistry journal article supplement (doi:10.1039/d2fo01384c), 2022-01-01

**Carvacrol preserves antioxidant status and attenuates kidney fibrosis via  
modulation of the TGF- $\beta$ 1/Smad signaling and inflammation**

Chetan Ram<sup>1</sup>, Shobhit Gairola<sup>1</sup>, Abu Mohammad Syed<sup>1</sup>, Shobhit Verma<sup>2</sup>, Madhav  
Nilakanth Mugale<sup>2</sup>, Bidya Dhar Sahu<sup>1\*</sup>

<sup>1</sup> Department of Pharmacology & Toxicology, National Institute of Pharmaceutical Education and Research (NIPER)-Guwahati, Changsari, PIN-781101, Assam, India.

<sup>2</sup> Toxicology & Experimental Medicine, CSIR- Central Drug Research Institute (CDRI), Lucknow-226 031, India.

\*Corresponding Author:

Dr. Bidya Dhar Sahu, Ph.D., Assistant Professor, Department of Pharmacology & Toxicology, National Institute of Pharmaceutical Education and Research (NIPER)-Guwahati, Changsari-781101, Assam, India.

Email ID: [bidyasha@gmail.com](mailto:bidyasha@gmail.com); [bidya.sahu@niperguwahati.ac.in](mailto:bidya.sahu@niperguwahati.ac.in)

## Raw western blot images

**Fig. 3A: Uncropped raw western blot images of TGF- $\beta$ , p-Smad2/3, Smad2/3, and  $\beta$ -actin in kidneys.**

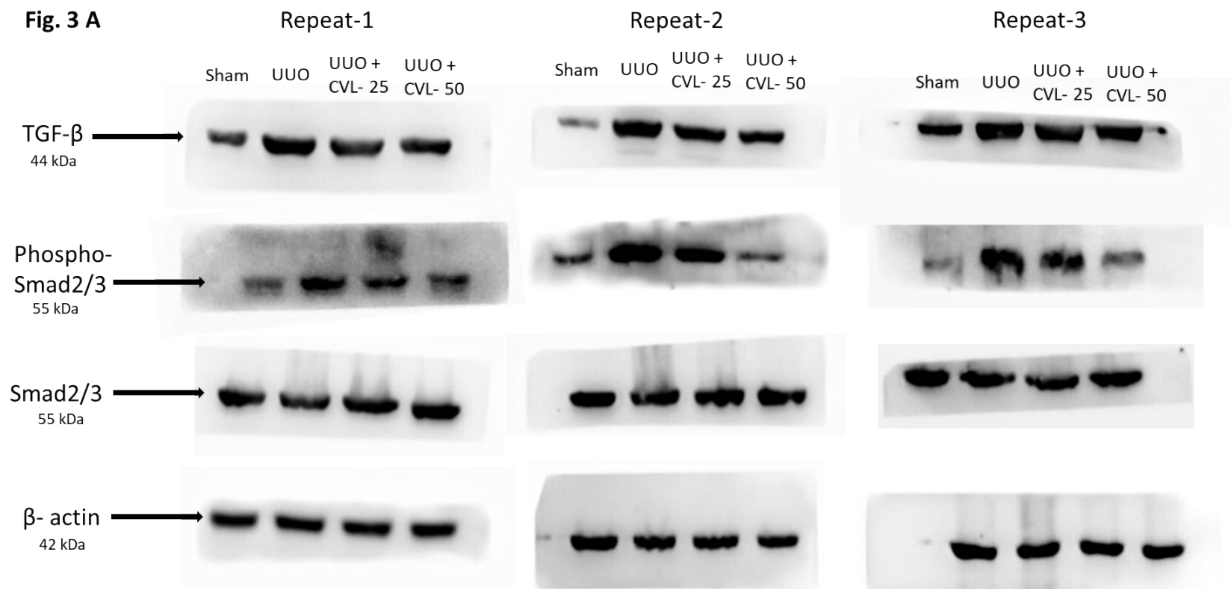

**Fig. 3A: Uncropped raw western blot images of Fibronectin, collagen III, collagen I, and  $\beta$ -actin in kidneys.**

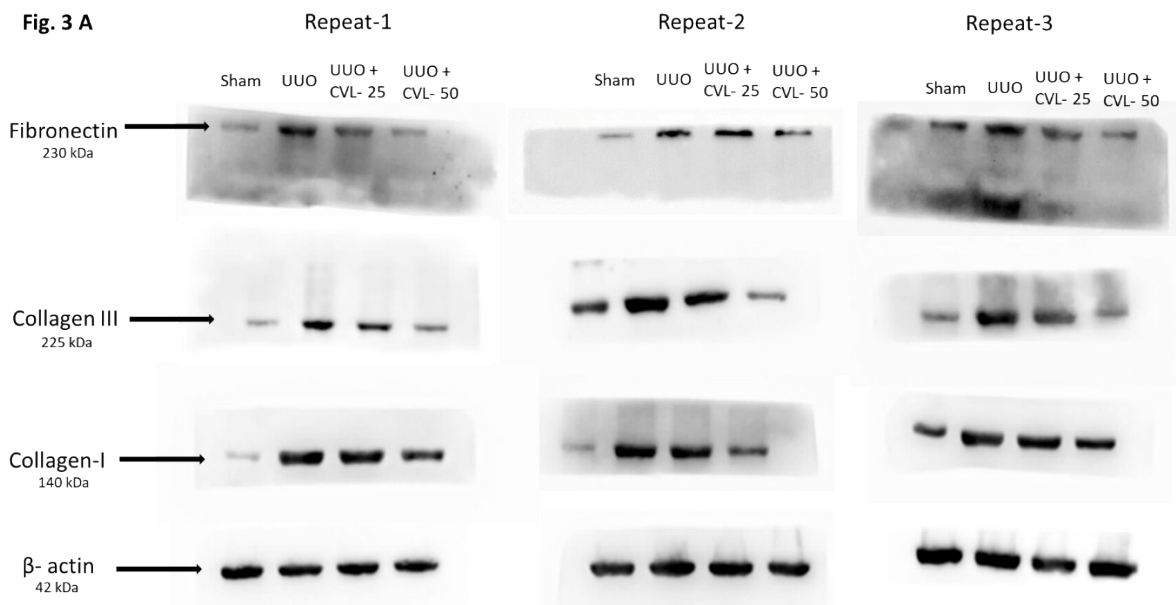

**Fig. 5A: Uncropped raw western blot images of  $\alpha$ -SMA, vimentin, E-cadherin, and  $\beta$ -actin in kidneys.**

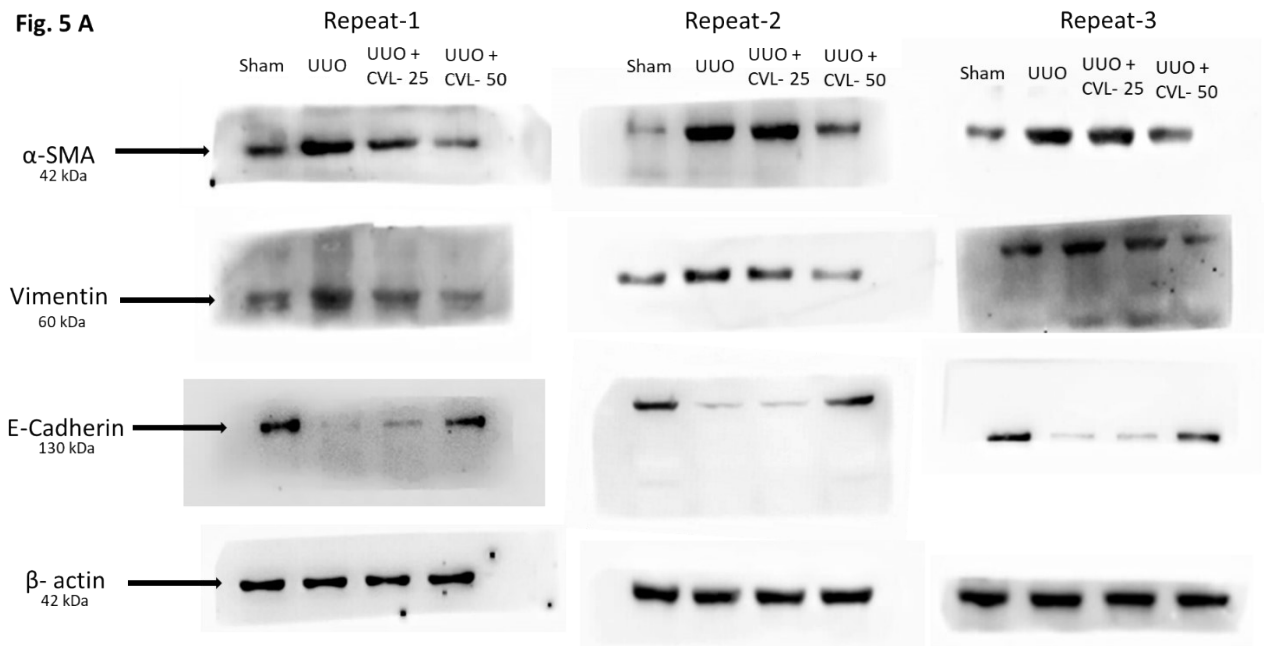

**Fig. 5F: Uncropped raw western blot images of E-cadherin, vimentin, and  $\beta$ -actin in NRK 52E cells.**

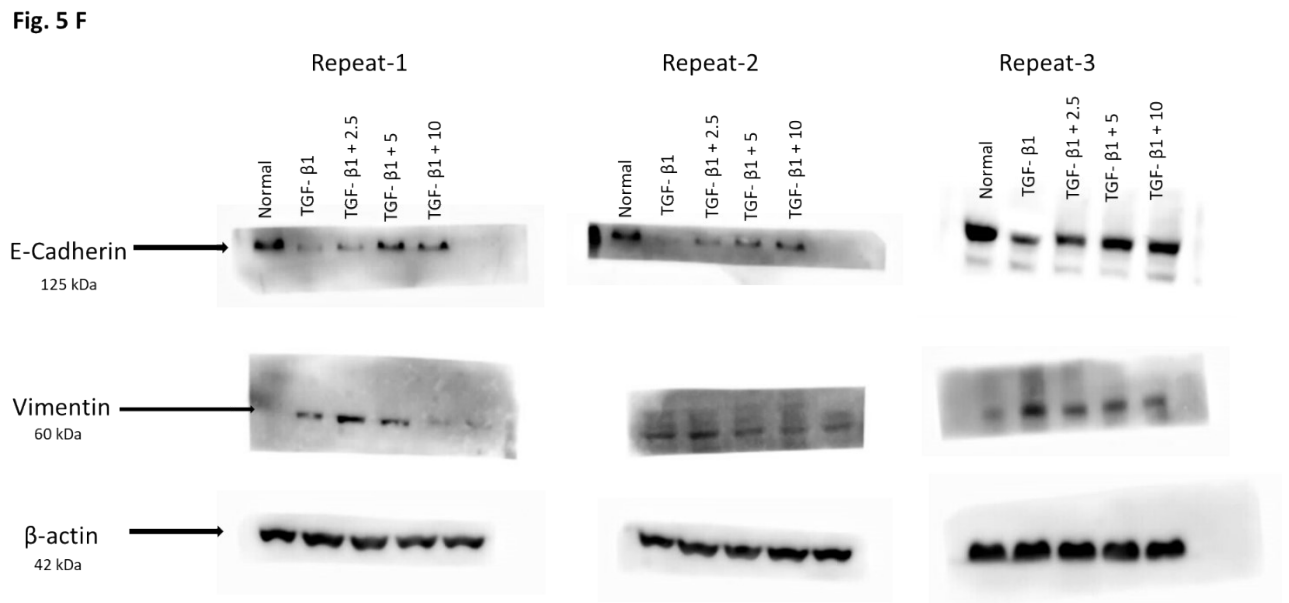

**Fig. 6D: Uncropped raw western blot images of Nrf2, NQO1, and  $\beta$ -actin in kidneys.**

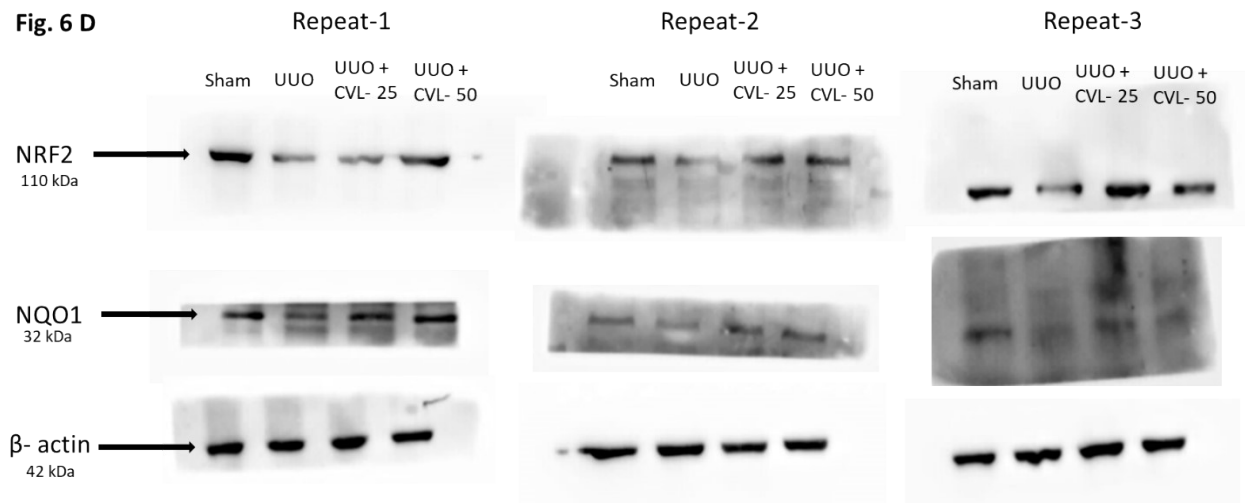

**Fig. 7F: Uncropped raw western blot images of NF-kB (p65), phospho-NF-kB (p65), and  $\beta$ -actin in kidneys.**

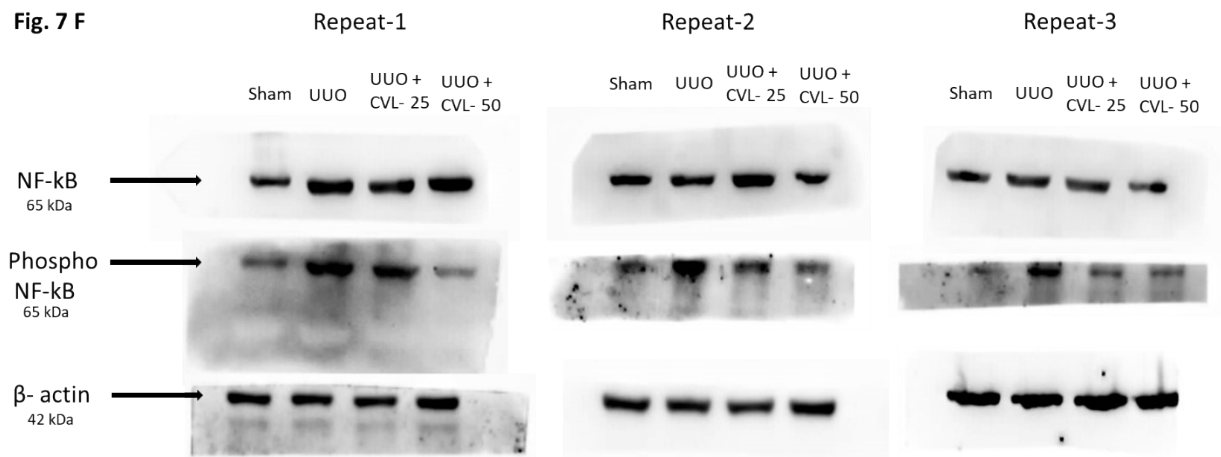

**Fig. 7H: Uncropped raw western blot images of COX-2 and  $\beta$ -actin in kidneys.**

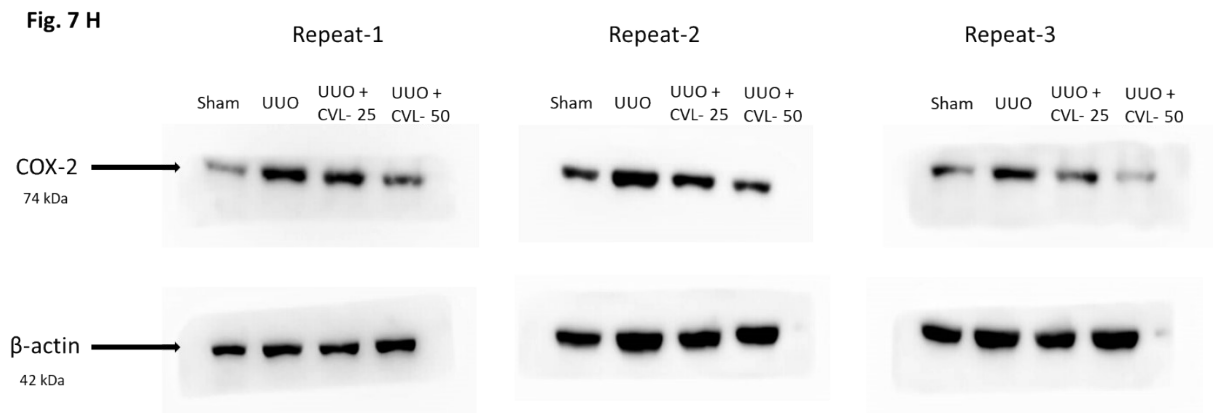

Supplement: d2fo01384c1.pdf [file d2fo01384c1.pdf]
